# Supplementary material for: Genetic Diversity of Actinobacillus pleuropneumoniae Serovars in Hungary
Source: MDPI journal article supplement (doi:10.3390/vetsci9100511), 2022-09-20
Supplement: s1 [file s1]

**Supplementary Table S2.: Genome contiguity statistics as output by quast.**

| Assembly                   | 51/95   | A12     | A149    | A16     | 84/14   | A125    | A140    | A185    | 211/13  |
|----------------------------|---------|---------|---------|---------|---------|---------|---------|---------|---------|
| # contigs (>= 0 bp)        | 146     | 99      | 182     | 182     | 2673    | 104     | 137     | 97      | 1713    |
| # contigs (>= 1000 bp)     | 44      | 41      | 51      | 51      | 98      | 49      | 49      | 48      | 84      |
| # contigs (>= 5000 bp)     | 32      | 33      | 37      | 37      | 60      | 38      | 36      | 39      | 58      |
| # contigs (>= 10000 bp)    | 29      | 27      | 28      | 28      | 53      | 32      | 33      | 34      | 51      |
| # contigs (>= 25000 bp)    | 25      | 24      | 25      | 25      | 32      | 26      | 27      | 27      | 34      |
| # contigs (>= 50000 bp)    | 11      | 13      | 12      | 12      | 12      | 12      | 11      | 11      | 13      |
| Total length (>= 0 bp)     | 2282301 | 2276316 | 2329525 | 2329525 | 3012367 | 2266880 | 2274712 | 2266725 | 2724300 |
| Total length (>= 1000 bp)  | 2254886 | 2260285 | 2293572 | 2293572 | 2300554 | 2257902 | 2255931 | 2258183 | 2273306 |
| Total length (>= 5000 bp)  | 2230146 | 2242443 | 2258528 | 2258528 | 2222940 | 2230617 | 2227165 | 2237250 | 2224147 |
| Total length (>= 10000 bp) | 2209874 | 2201550 | 2197563 | 2197563 | 2175036 | 2190547 | 2204787 | 2204585 | 2177961 |
| Total length (>= 25000 bp) | 2150242 | 2156084 | 2156307 | 2156307 | 1838952 | 2102072 | 2117766 | 2100483 | 1919546 |
| Total length (>= 50000 bp) | 1621739 | 1732583 | 1636012 | 1636012 | 1102269 | 1574432 | 1523396 | 1468601 | 1174745 |
| # contigs                  | 129     | 79      | 158     | 158     | 2530    | 58      | 78      | 57      | 1621    |
| Largest contig             | 331517  | 331330  | 331464  | 331464  | 157667  | 296759  | 296311  | 246581  | 175883  |
| Total length               | 2280089 | 2273812 | 2326649 | 2326649 | 2993898 | 2262334 | 2268791 | 2262903 | 2711841 |
| GC (%)                     | 41.21   | 41.14   | 41.15   | 41.15   | 41.03   | 41.16   | 41.18   | 41.17   | 41.26   |
| N50                        | 132709  | 121850  | 111799  | 111799  | 35966   | 108593  | 108593  | 109394  | 43028   |
| N75                        | 49412   | 53844   | 48924   | 48924   | 4229    | 47431   | 47280   | 47380   | 16717   |
| L50                        | 6       | 7       | 7       | 7       | 21      | 7       | 7       | 7       | 17      |
| L75                        | 13      | 13      | 15      | 15      | 65      | 15      | 15      | 16      | 40      |
| # N's per 100 kbp          | 51.93   | 17.15   | 16.76   | 16.76   | 13.03   | 19.18   | 17.32   | 21.39   | 14.60   |
