# Supplementary material for: Genetic Diversity of Actinobacillus pleuropneumoniae Serovars in Hungary
Source: MDPI journal article supplement (doi:10.3390/vetsci9100511), 2022-09-20
Supplement: s1 [file s1]

Supplementary Table S1.: Characteristics of isolates. ND: not determined; empty cells in columns settlement of origin and year mark missing data

| isolate | pulsotype | biotype | serovariant | organ       | settlement of origin | year | resistance gene | toxin gene profile         |
|---------|-----------|---------|-------------|-------------|----------------------|------|-----------------|----------------------------|
| A164    | A1        | 2       | 13          | lung        |                      | 2008 | -               | apxIB, apxII, apxIV        |
| A185    | A1        | 2       | 13          | lung        | Dalmand              | 2009 | tetL            | apxIB, apxII, apxIV        |
| A143    | A1        | 2       | 13          | lung        | Dalmand              | 2006 | tetL            | apxIB, apxII, apxIV        |
| A138    | A1        | 2       | 13          | lung        | Töltéstava           | 2006 | -               | apxIB, apxII, apxIV        |
| A142    | A1        | 2       | 13          | lung        | Dalmand              | 2006 | tetL            | apxIB, apxII, apxIV        |
| A13     | A1        | 2       | 13          | lung        |                      | 1989 | -               | apxIV                      |
| A131    | A1        | 2       | 13          | lung        | Kisújszállás         | 2006 | -               | apxIB, apxII, apxIV        |
| A125    | A1        | 2       | 13          | lung        | Dalmand              | 2006 | tetL            | apxIB, apxII, apxIV        |
| A162    | A1        | 2       | 13          | lung        |                      | 2008 | tetB            | apxIB, apxII, apxIV        |
| A163    | A1        | 2       | 13          | lung        |                      | 2008 | -               | apxIB, apxII, apxIV        |
| A165    | A1        | 2       | 13          | lung        |                      | 2008 | -               | apxIB, apxII, apxIV        |
| 211/13  | A1        | 2       | 13          | lung        | Ormándlak            | 2013 | -               | apxIB, apxII, apxIV        |
| 51/95   | A1        | 2       | 13          | lung        |                      | 1995 | -               | apxIB, apxII, apxIV        |
| A184    | A1        | 2       | 13          | lung        | Dalmand              | 2009 | tetL            | apxIB, apxII, apxIV        |
| A150    | A2        | 2       | 13          | lung        | Bábolna              | 2006 | tetL            | apxIB, apxII, apxIV        |
| A11     | A2        | 2       | 13          | lung        |                      |      | tetL            | apxIB, apxII, apxIV        |
| A144    | A2        | 2       | 13          | lung        |                      | 2006 | -               | apxIB, apxII, apxIV        |
| A137    | A2        | 2       | 13          | lung        |                      | 2005 | -               | apxIB, apxII, apxIV        |
| A145    | A2        | 2       | 13          | lung        |                      | 2005 | -               | apxIB, apxII, apxIV        |
| A141    | A2        | 2       | 13          | lung        |                      | 2006 | -               | apxIB, apxII, apxIV        |
| A140    | A2        | 2       | 13          | lung        | Gerjen               | 2006 | tetL, blaROB    | apxIB, apxII, apxIV        |
| A134    | A2        | 2       | 13          | lung        | Baja                 | 2006 | -               | apxIB, apxII, apxIV        |
| A183    | A2        | 2       | 13          | lung        | Gerjen               | 2009 | tetL            | apxIB, apxII, apxIV        |
| A16     | A2        | 2       | 13          | lung        |                      | 1998 | -               | apxIB, apxII, apxIV        |
| 84/14   | A2        | 2       | 13          | endocardium |                      | 2014 | tetL            | apxIB, apxII, apxIV        |
| A149    | B         | 2       | 14          | lung        |                      | 2005 | -               | apxIB, apxII, apxIV        |
| A12     | B         | 2       | 14          | lung        | Dalmand              |      | -               | apxIB, apxII, apxIV        |
| A148    | U         | 2       | ND          | lung        | Hercegszántó         | 2005 | -               | apxIV                      |
| A146    | C         | 1       | 9           | lung        | Szeghalom            | 2003 | -               | apxIA, apxIB, apxII, apxIV |
| A129    | C         | 1       | 9           | lung        |                      | 2006 | -               | apxIA, apxIB, apxII, apxIV |
| A147    | C         | 1       | 9           | lung        | Szeghalom            | 2003 | -               | apxIA, apxIB, apxII, apxIV |
| A174    | C         | 1       | 9           | lung        |                      |      | -               | apxIA, apxIB, apxII, apxIV |

|        |    |   |            |      |                  |      |      |                             |
|--------|----|---|------------|------|------------------|------|------|-----------------------------|
| A175   | C  | 1 | 9          | lung |                  |      | -    | apxIA, apxIB, apxII, apxIV  |
| A170   | C  | 1 | 9          | lung |                  | 2009 | -    | apxIA, apxIB, apxII, apxIV  |
| 8/12   | C  | 1 | 9          | lung | Barcs            | 2012 | -    | apxIA, apxIB, apxII, apxIV  |
| 327/12 | C  | 1 | 9          | lung | Marcaltó         | 2012 | -    | apxIA, apxIB, apxII, apxIV  |
| 16/14  | C  | 1 | 9          | lung | Környe           | 2014 | -    | apxIA, apxIB, apxII, apxIV  |
| A169   | C  | 1 | 9          | lung |                  | 2009 | -    | apxIA, apxIB, apxII, apxIV  |
| A31    | C  | 1 | 9          | lung | Pötréte          | 2002 | tetH | apxIA, apxIB, apxII, apxIV  |
| 112/14 | U  | 2 | ND         | lung | Püspökladány     | 2014 | tetB | apxIB, apxII, apxIV         |
| 206/14 | U  | 2 | ND         | lung | Bajánsenye       | 2014 | -    | ND                          |
| 32/14  | U  | 2 | ND         | lung | Fábiánsebestyén  | 2014 | -    | ND                          |
| 270/12 | D1 | 1 | 16         | lung | Komárom          | 2012 | tetB | apxIA, apxIB, apxII, apxIV  |
| 272/12 | D1 | 1 | 16         | lung | Csém             | 2012 | tetL | apxIA, apxIB, apxII, apxIV  |
| 51/14  | D1 | 1 | 16         | lung | Hajdúszoboszló   | 2014 | -    | apxIA, apxIB, apxII, apxIV  |
| 85/14  | D1 | 1 | 16         | lung | Karcag           | 2014 | -    | apxIA, apxIB, apxII, apxIV  |
| 107/14 | D1 | 1 | 16         | lung | Hajdúnánás-Tedej | 2014 | -    | apxIA, apxIB, apxII, apxIV  |
| 205/14 | D1 | 1 | 16         | lung | Hajdúszoboszló   | 2014 | -    | apxIA, apxIB, apxII, apxIV  |
| A78    | D2 | 1 | 10         | lung |                  | 2003 | -    | ND                          |
| A89    | D2 | 1 | 10         | lung |                  |      | -    | ND                          |
| A44    | D2 | 1 | 10         | lung |                  | 2002 | -    | ND                          |
| A79    | D2 | 1 | 10         | lung |                  | 2003 | -    | ND                          |
| 145/14 | D2 | 1 | 10         | lung | Bajánsenye       | 2014 | -    | apxIA, apxIB, apxII, apxIV  |
| 286/12 | E  | 1 | untypeable | lung | Elek             | 2012 | -    | apxIA, apxIB, apxII, apxIV  |
| 203/14 | E  | 1 | untypeable | lung | Elek             | 2014 | -    | apxIA, apxIB, apxII, apxIV  |
| A7     | U  | 1 | 12         | lung |                  | 1996 | -    | ND                          |
| 287/12 | U  | 1 | 12         | lung | Komárom          | 2012 | -    | apxIB, apxII, apxIV         |
| A168   | U  | 1 | ND         | lung | reference strain |      | -    | ND                          |
| A173   | U  | 1 | 1/5b       | lung |                  |      | -    | ND                          |
| A96    | U  | 1 | ND         | lung |                  |      | -    | ND                          |
| A172   | U  | 1 | 1/5a       | lung |                  |      | -    | ND                          |
| A123   | U  | 1 | ND         | lung |                  | 2005 | -    | ND                          |
| A72    | F  | 1 | ND         | lung | Pápa             | 2003 | tetB | ND                          |
| A74    | F  | 1 | ND         | lung | Pápa             | 2003 | tetB | ND                          |
| 322/12 | G1 | 1 | 2          | lung | Nagyhegyes       | 2012 | -    | apxIB, apxII, apxIII, apxIV |
| 67/14  | G1 | 1 | 2          | lung | Hajdúdorog       | 2014 | -    | apxIB, apxII, apxIII, apxIV |
| A187   | G2 | 1 | 2          | lung |                  | 2009 | -    | apxIB, apxII, apxIII, apxIV |

|        |    |   |   |      |                  |      |      |                             |
|--------|----|---|---|------|------------------|------|------|-----------------------------|
| 309/12 | G2 | 1 | 2 | lung | Felsőcikola      | 2012 | -    | apxIB, apxII, apxIII, apxIV |
| 323/12 | G2 | 1 | 2 | lung | Nagyhegyes       | 2012 | -    | apxIB, apxII, apxIII, apxIV |
| A151   | G3 | 1 | 2 | lung | Városföld        | 2006 | -    | apxIB, apxII, apxIII, apxIV |
| A126   | G3 | 1 | 2 | lung |                  | 2006 | -    | apxIB, apxII, apxIII, apxIV |
| A40    | H  | 1 | 2 | lung |                  | 2002 | -    | apxIB, apxII, apxIII, apxIV |
| A63    | H  | 1 | 2 | lung |                  | 2002 | -    | apxIB, apxII, apxIII, apxIV |
| 329/12 | H  | 1 | 2 | lung | Marcaltó         | 2012 | -    | apxIB, apxII, apxIII, apxIV |
| A37    | H  | 1 | 2 | lung |                  | 2001 | -    | apxIB, apxII, apxIII, apxIV |
| A71    | H  | 1 | 2 | lung |                  | 2001 | -    | apxIB, apxII, apxIII, apxIV |
| 262/12 | I1 | 1 | 2 | lung | Rábaszentandrás  | 2012 | tetL | apxIB, apxII, apxIII, apxIV |
| 276/12 | I1 | 1 | 2 | lung | Beremend         | 2012 | tetL | apxIB, apxII, apxIII, apxIV |
| 346/12 | I1 | 1 | 2 | lung | Tiszatenyő       | 2012 | -    | apxIB, apxII, apxIII, apxIV |
| A132   | I1 | 1 | 2 | lung | Sárbogárd        | 2006 | -    | apxIB, apxII, apxIII, apxIV |
| A76    | I1 | 1 | 2 | lung | Nagyigmánd       | 2003 | -    | apxIB, apxII, apxIII, apxIV |
| A130   | I1 | 1 | 2 | lung | Besenyő          | 2006 | -    | apxIB, apxII, apxIII, apxIV |
| 86/14  | I2 | 1 | 2 | lung | Derecske         | 2014 | -    | apxIB, apxII, apxIII, apxIV |
| 198/14 | I2 | 1 | 2 | lung | Nagyigmánd       | 2014 | -    | apxIB, apxII, apxIII, apxIV |
| 202/14 | I2 | 1 | 2 | lung | Küngös           | 2014 | -    | apxIB, apxII, apxIII, apxIV |
| 246/12 | I2 | 1 | 2 | lung | Gyömöre          | 2012 | tetL | apxIB, apxII, apxIII, apxIV |
| 320/13 | I2 | 1 | 2 | lung | Hódmezővásárhely | 2013 | -    | apxIB, apxII, apxIII, apxIV |
| 200/14 | I2 | 1 | 2 | lung | Lébény           | 2014 | -    | apxIB, apxII, apxIII, apxIV |
| 209/14 | I2 | 1 | 2 | lung | Csillagpuszta    | 2014 | -    | apxIB, apxII, apxIII, apxIV |
| A48    | I2 | 1 | 2 | lung | Pásztó           | 2002 | -    | apxIB, apxII, apxIII, apxIV |
| A45    | I2 | 1 | 2 | lung | Lajoskomárom     | 2002 | -    | apxIB, apxII, apxIII, apxIV |
| A41    | I2 | 1 | 2 | lung |                  | 2002 | -    | apxIB, apxII, apxIII, apxIV |
| A133   | I2 | 1 | 2 | lung | Pásztó           | 2006 | -    | apxIB, apxII, apxIII, apxIV |
| A136   | I2 | 1 | 2 | lung | Pásztó           | 2006 | -    | apxIB, apxII, apxIII, apxIV |
| A122   | I2 | 1 | 2 | lung | Pásztó           | 2004 | -    | apxIB, apxII, apxIII, apxIV |
| A127   | I2 | 1 | 2 | lung | Pásztó           | 2006 | -    | apxIB, apxII, apxIII, apxIV |
| A42    | I2 | 1 | 2 | lung | Pásztó           | 2002 | -    | apxIB, apxII, apxIII, apxIV |
| A109   | I2 | 1 | 2 | lung |                  | 2002 | -    | apxIB, apxII, apxIII, apxIV |
| A27    | I2 | 1 | 2 | lung |                  | 2002 | -    | apxIB, apxII, apxIII, apxIV |
| A167   | I2 | 1 | 2 | lung | Kerézteleki      | 2008 | -    | apxIB, apxII, apxIII, apxIV |
| A166   | I2 | 1 | 2 | lung | Kerézteleki      | 2008 | -    | apxIB, apxII, apxIII, apxIV |
| A186   | I2 | 1 | 2 | lung | Piritó           | 2009 | -    | apxIB, apxII, apxIII, apxIV |

|        |    |   |   |      |                 |      |      |                             |
|--------|----|---|---|------|-----------------|------|------|-----------------------------|
| A182   | I2 | 1 | 2 | lung | Piritó          | 2009 | -    | apxIB, apxII, apxIII, apxIV |
| A181   | I2 | 1 | 2 | lung | Pásztó          | 2009 | -    | apxIB, apxII, apxIII, apxIV |
| 249/12 | I2 | 1 | 2 | lung | Mocsa           | 2012 | -    | apxIB, apxII, apxIII, apxIV |
| 208/14 | I2 | 1 | 2 | lung | Tárkány         | 2014 | -    | apxIB, apxII, apxIII, apxIV |
| 196/12 | I2 | 1 | 2 | lung | Küngös          | 2012 | tetB | apxIB, apxII, apxIII, apxIV |
| 26/14  | I2 | 1 | 2 | lung | Hajdúböszörmény | 2014 | -    | apxIB, apxII, apxIII, apxIV |
| A19    | I2 | 1 | 2 | lung |                 | 1998 | -    | apxIB, apxII, apxIII, apxIV |
| 416/13 | I3 | 1 | 2 | lung | Tab             | 2013 | -    | apxIB, apxII, apxIII, apxIV |
| A171   | I3 | 1 | 2 | lung |                 |      | -    | apxIB, apxII, apxIII, apxIV |
| A68    | J  | 1 | 2 | lung | Bábolna         | 2002 | -    | apxIB, apxII, apxIV         |
| A70    | J  | 1 | 2 | lung | Bábolna         | 2002 | -    | apxIB, apxII, apxIV         |
| A67    | J  | 1 | 2 | lung | Bábolna         | 2002 | -    | apxIB, apxII, apxIV         |
